# Supplementary material for: Plasma glutamate–modulated interaction of A2AR and mGluR5 on BMDCs aggravates traumatic brain injury–induced acute lung injury
Source: PubMed Central journal article supplement — J Exp Med. 2013 Apr 8;210(4):839–51. doi: 10.1084/jem.20122196 (PMC3620361; doi:10.1084/jem.20122196), 2013-04-08
Supplement: supp_jem.20122196_JEM_20122196_sm.pdf [file supp_jem.20122196_JEM_20122196_sm.pdf]

## SUPPLEMENTAL MATERIAL

Dai et al., <http://www.jem.org/cgi/content/full/jem.20122196/DC1>**Table S1.** Characteristics of patients with severe TBI-induced ALI, including age, initial Glasgow coma scale (iGOS), and the time of ALI onset

| Patient | Age       | iGOS | ALI onset (time after TBI) |
|---------|-----------|------|----------------------------|
|         | <i>yr</i> |      | <i>h</i>                   |
| 1       | 49        | 3    | 6                          |
| 2       | 20        | 4    | 8                          |
| 3       | 40        | 5    | 7                          |
| 4       | 23        | 3    | 6                          |
| 5       | 59        | 3    | 10                         |
| 6       | 33        | 3    | 10                         |
| 7       | 37        | 4    | 9                          |
| 8       | 26        | 3    | 7                          |
| 9       | 52        | 4    | 6                          |
| 10      | 25        | 4    | 8                          |

The mean (SD) for age, iGOS, and ALI onset are 36.4 (14) yr, 3.6 (0.7), and 7.7 (1.6) h, respectively. The range (min-max) for age, iGOS, and ALI onset are 25–59 yr, 3–5, and 6–10 h, respectively.

**Table S2.** Characteristics of patients with lung trauma-induced ALI

| Patient | Age       | ALI onset (time after lung trauma) |
|---------|-----------|------------------------------------|
|         | <i>yr</i> | <i>h</i>                           |
| 1       | 52        | 4                                  |
| 2       | 51        | 3                                  |
| 3       | 44        | 5                                  |
| 4       | 50        | 3                                  |
| 5       | 32        | 6                                  |
| 6       | 33        | 5                                  |
| 7       | 41        | 4                                  |
| 8       | 33        | 3                                  |

The mean (SD) for age and ALI onset are 42 (8.6) yr and 4.1 (1.1) h, respectively. The range (min-max) for age and ALI onset are 32–52 yr and 3–6 h, respectively.
